# Supplementary material
Source: publisher figshare collection journal article supplement (https://acs.figshare.com/ndownloader/files/13113737)
Supplement: Supplementary file 1 [file 13113737]

**Submission to ACS Sustainable Chemistry & Engineering**

Page: 10; Figure: 5; Table: 0.

### **Supporting Information**

**In-situ fabrication of electro-Fenton catalyst from  $\text{Fe}^{2+}$  in acid mine drainage:**

#### **Influence of coexisting metal cations**

Yi-Meng Sun, Lin-Feng Zhai\*, Ming-Feng Duan, Min Sun\*

Anhui Province Key Laboratory of Advanced Catalytic Materials and Reaction,  
School of Chemistry and Chemical Engineering, Hefei University of Technology,  
Hefei, 230009, China

**\* Corresponding author:**

Dr. Lin-Feng Zhai

Tel: +086-551-2901450;

E-mail: [linfengzhai@hfut.edu.cn](mailto:linfengzhai@hfut.edu.cn)

Dr. Min Sun

Tel: +086-551-2901450;

E-mail: [sunmin81@mail.ustc.edu.cn](mailto:sunmin81@mail.ustc.edu.cn)

The following is included as supporting information for this paper:

Page S4 **Section S1.** Methods on structure characterization and electrochemical analysis of the Fe<sub>3</sub>O<sub>4</sub>/GF composite.

Page S6 **Figure S1.** TG curves of the composites prepared from different synthetic AMDs. The inset displays the TG curves in the temperature range of 950 to 1000 °C.

Page S7 **Figure S2.** SEM images and elemental mappings of the composites prepared from synthetic AMDs with (A) 7 mM Co<sup>2+</sup>; (B) 0.7 mM Co<sup>2+</sup>; (C) 7 mM Mn<sup>2+</sup>; or (D) 0.7 mM Mn<sup>2+</sup> as coexisting metal cation.

Page S8 **Figure S3.** Decolorization efficiencies of RhB in five successive cycles at the composite cathodes prepared from synthetic AMDs with (A) 7 mM Co<sup>2+</sup>; (B) 7 mM Mn<sup>2+</sup>; (C) 0.7 mM Co<sup>2+</sup>; or (D) 0.7 mM Mn<sup>2+</sup> as coexisting metal cation.

Page S9 **Figure S4.** Decolorization efficiencies of RhB in the (A) pH 7.0 and (B) pH 3.0 EF systems; TOC removal efficiencies of RhB solution after (C) 15 h of degradation at pH 7.0 and (D) 12 h of degradation at pH 3.0 at the composite cathodes prepared from different synthetic AMDs. The

coexisting metal ions in the AMDs are (a)  $\text{Co}^{2+}$  and  $\text{Mn}^{2+}$  at 7 mM; (b)  $\text{Co}^{2+}$  and  $\text{Mn}^{2+}$  at 0.7 mM; (c) no coexisting metal ion; (d)  $\text{Co}^{2+}$ ,  $\text{Mn}^{2+}$ ,  $\text{Ni}^{2+}$  and  $\text{Zn}^{2+}$  at 7 mM; (e)  $\text{Co}^{2+}$ ,  $\text{Mn}^{2+}$ ,  $\text{Ni}^{2+}$  and  $\text{Zn}^{2+}$  at 0.7 mM; (f)  $\text{Co}^{2+}$ ,  $\text{Mn}^{2+}$ ,  $\text{Ni}^{2+}$ ,  $\text{Zn}^{2+}$ ,  $\text{Cu}^{2+}$  and  $\text{Al}^{3+}$  at 7 mM; and (g)  $\text{Co}^{2+}$ ,  $\text{Mn}^{2+}$ ,  $\text{Ni}^{2+}$ ,  $\text{Zn}^{2+}$ ,  $\text{Cu}^{2+}$  and  $\text{Al}^{3+}$  at 0.7 mM.

Page S10 **Figure S5.** Metal contents in the composites prepared from real AMD I and AMD II. The inset displays TG curves of the composites.

**Section S1. Methods on structure characterization and electrochemical analysis of the Fe<sub>3</sub>O<sub>4</sub>/GF composite.** Meal contents in the Fe<sub>3</sub>O<sub>4</sub>/GF composite were determined by thermogravimetry (TG) on a TGA DT-50 apparatus (Shimadzu, Japan) and X-ray fluorescence spectrometry (XRF) on an XRF-1800 apparatus (Shimadzu, Japan). Microscopic image of the composite and energy-dispersive X-ray spectroscopy (EDX) elemental mapping were obtained on a field emission gun scanning electron microscope (FEGSEM) (Zeiss Sigma, Germany). Valence states of metals were characterized by X-ray photoelectron spectroscopy (XPS) on an ESCALAB 250 spectrometer (Thermo, USA) equipped with a monochromatic Mg K $\alpha$  X-ray source (1253.6 eV). Crystalline phases of metals were identified by X-ray diffractogram (XRD) using a Bruker D8 advance X-ray diffractometer (Germany) equipped with graphite-monochromated Cu K $\alpha$  radiation ( $\lambda = 1.54\text{\AA}$ ). The composites were cut into  $5 \times 5 \text{ mm}^2$  pieces for SEM and XRD analyses, and were ground into powders for TG and XPS analyses.

Electrochemical impedance spectroscopy (EIS) was performed on a CHI 660D electrochemical workstation (CH Instruments Inc., USA), with the prepared Fe<sub>3</sub>O<sub>4</sub>/GF composite used as working electrode, Pt as counter electrode and saturated calomel electrode (SCE) as the reference. The electrolyte was 50 mM Na<sub>2</sub>SO<sub>4</sub> containing 25 mg L<sup>-1</sup> RhB at pH 7.0. The frequency of the AC signal varied from 100 kHz to 0.01 Hz with potential amplitude of 5 mV at the open circuit potential. Scanning electrochemical microscopy (SECM) was carried out on a Sensolytics SECM (Germany) in three-electrode mode. The SECM tip (working electrode) was a

25  $\mu\text{m}$  Pt microelectrode, the reference electrode was Ag/AgCl, and the counter electrode was a platinum wire. The substrate was nickel foam loaded with  $\text{Fe}_3\text{O}_4/\text{GF}$  composite powder. To prepare the substrate, a mixture of 95 wt% of  $\text{Fe}_3\text{O}_4/\text{GF}$  composite and 5 wt% of polyvinylidene fluoride (PVDF) was ground with an appropriate amount of N-methyl-2-pyrrolidone (NMP) for 30 min to obtain a black paste. The paste was then cast on the nickel foam and dried in a vacuum oven at 50  $^{\circ}\text{C}$  overnight. The obtained nickel foam was pressed at 10 MPa for 1 min. The electrolyte consisted of 0.1 M KCl and 5 mM  $[\text{Fe}(\text{CN})_6]^{4-}$ , and the tip potential was set at +500 mV to initiate the oxidation of  $[\text{Fe}(\text{CN})_6]^{4-}$ . Scans were conducted both vertically and parallel above the surface of substrate at a rate of 10  $\mu\text{m s}^{-1}$ . The interval between two data points was 12.5  $\mu\text{m}$ , and the surface map of an area  $200 \times 200 \mu\text{m}$  was measured using the positive feedback mode.

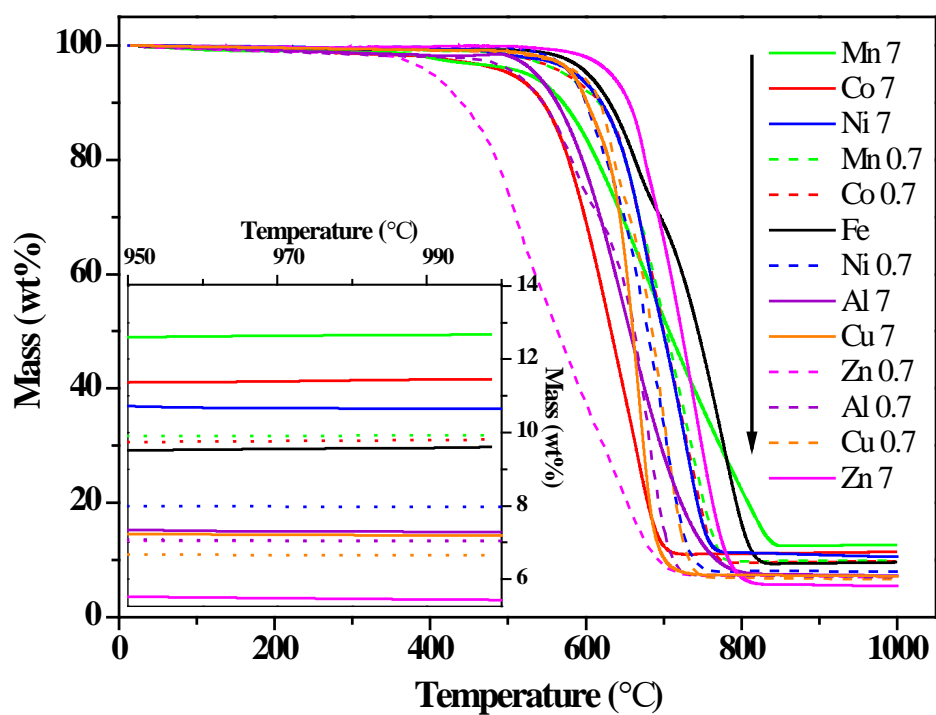

**Figure S1.** TG curves of the composites prepared from different synthetic AMDs. The inset displays the TG curves in the temperature range of 950 to 1000 °C.

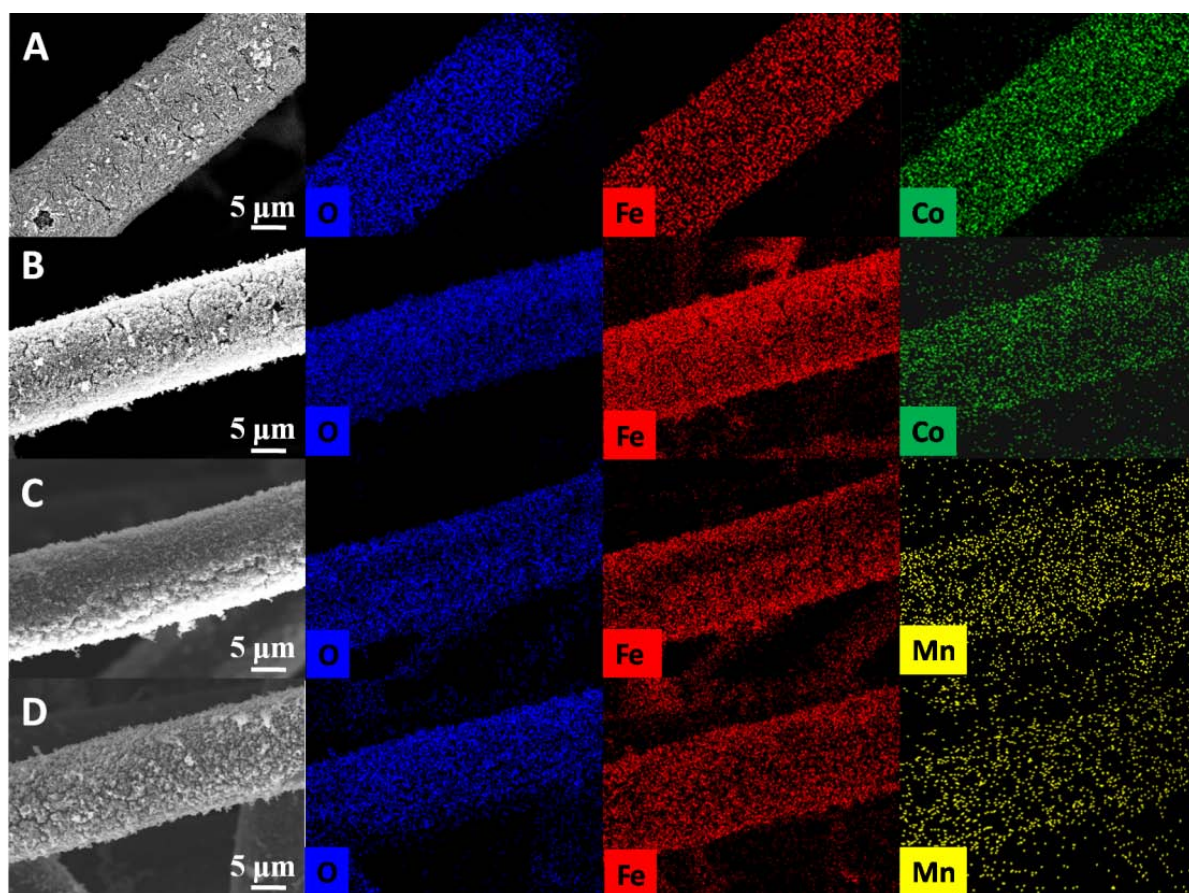

**Figure S2.** SEM images and elemental mappings of the composites prepared from synthetic AMDs with (A) 7 mM  $\text{Co}^{2+}$ ; (B) 0.7 mM  $\text{Co}^{2+}$ ; (C) 7 mM  $\text{Mn}^{2+}$ ; or (D) 0.7 mM  $\text{Mn}^{2+}$  as coexisting metal cation.

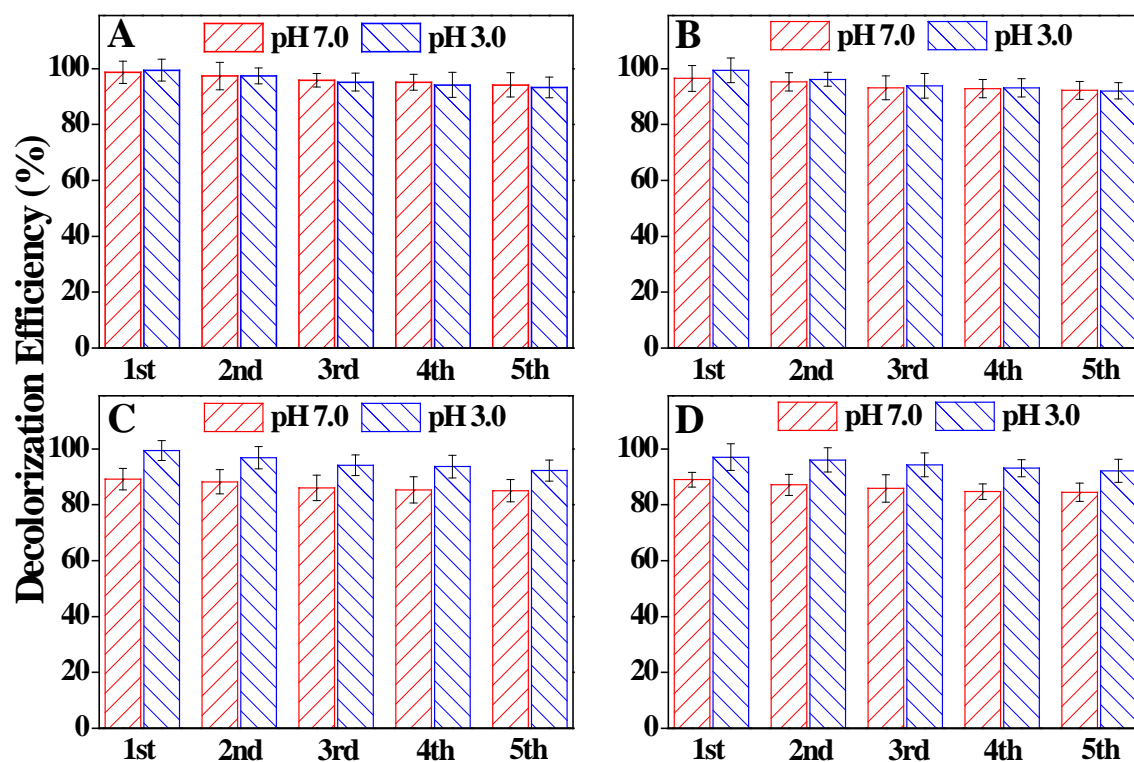

**Figure S3.** Decolorization efficiencies of RhB in five successive cycles at the composite cathodes prepared from synthetic AMDs with (A) 7 mM  $\text{Co}^{2+}$ ; (B) 7 mM  $\text{Mn}^{2+}$ ; (C) 0.7 mM  $\text{Co}^{2+}$ ; or (D) 0.7 mM  $\text{Mn}^{2+}$  as coexisting metal cation.

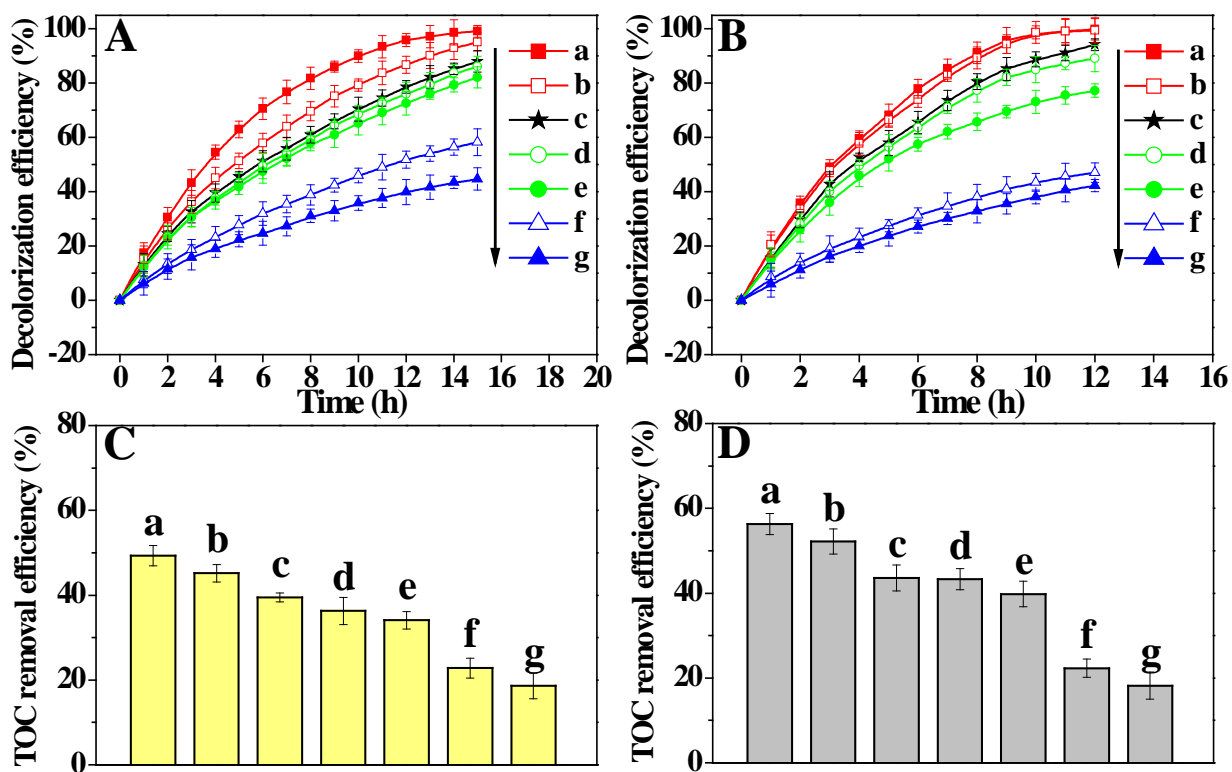

**Figure S4.** Decolorization efficiencies of RhB in the (A) pH 7.0 and (B) pH 3.0 EF systems; TOC removal efficiencies of RhB solution after (C) 15 h of degradation at pH 7.0 and (D) 12 h of degradation at pH 3.0 at the composite cathodes prepared from different synthetic AMDs. The coexisting metal ions in the AMDs are (a)  $\text{Co}^{2+}$  and  $\text{Mn}^{2+}$  at 7 mM; (b)  $\text{Co}^{2+}$  and  $\text{Mn}^{2+}$  at 0.7 mM; (c) no coexisting metal ion; (d)  $\text{Co}^{2+}$ ,  $\text{Mn}^{2+}$ ,  $\text{Ni}^{2+}$  and  $\text{Zn}^{2+}$  at 7 mM; (e)  $\text{Co}^{2+}$ ,  $\text{Mn}^{2+}$ ,  $\text{Ni}^{2+}$  and  $\text{Zn}^{2+}$  at 0.7 mM; (f)  $\text{Co}^{2+}$ ,  $\text{Mn}^{2+}$ ,  $\text{Ni}^{2+}$ ,  $\text{Zn}^{2+}$ ,  $\text{Cu}^{2+}$  and  $\text{Al}^{3+}$  at 7 mM; and (g)  $\text{Co}^{2+}$ ,  $\text{Mn}^{2+}$ ,  $\text{Ni}^{2+}$ ,  $\text{Zn}^{2+}$ ,  $\text{Cu}^{2+}$  and  $\text{Al}^{3+}$  at 0.7 mM.

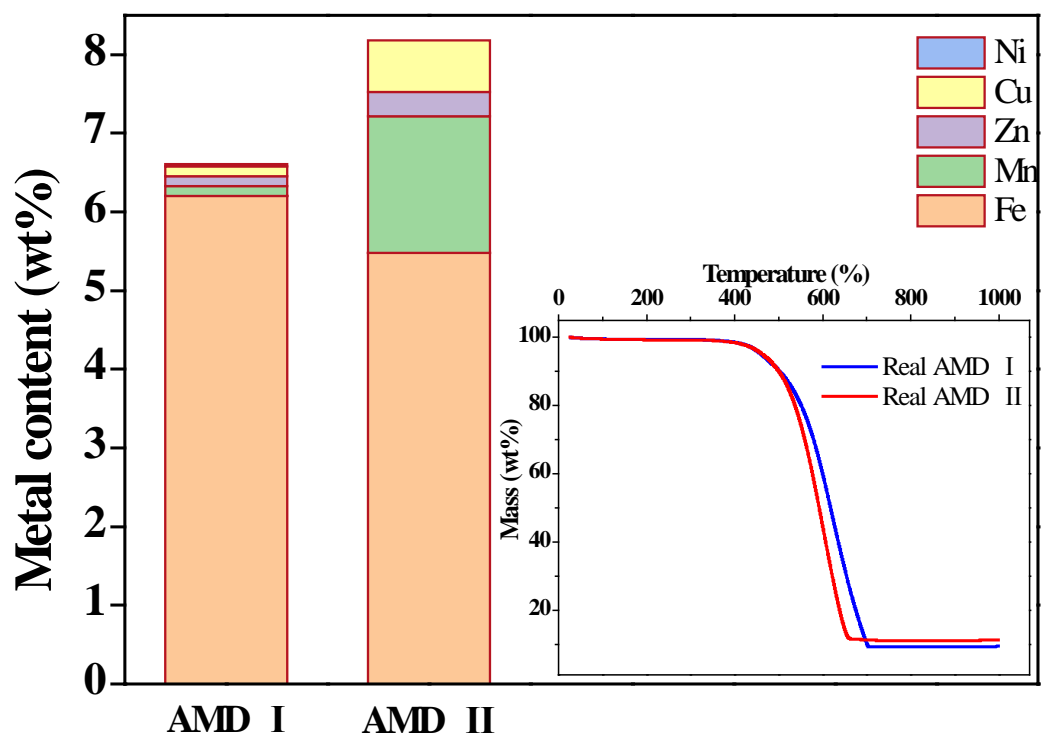

**Figure S5.** Metal contents in the composites prepared from real AMD I and AMD II. The inset displays TG curves of the composites.
